# Supplementary material
Source: publisher figshare collection journal article supplement (https://frontiersin.figshare.com/ndownloader/files/26479220)
Supplement: Supplementary file [file 26479220]

## *Supplementary Material*

### **Discovery of Brominated Alboflavusins With Anti-MRSA Activities**

**Chao Li<sup>1,2†</sup>, Wuyundalai Bao<sup>3†</sup>, Haoyue Zhang<sup>4</sup>, Zhitang Lyu<sup>4</sup>, Yihua Chen<sup>1,2</sup>, Zhengyan Guo<sup>1,2\*</sup>**

<sup>1</sup>State Key Laboratory of Microbial Resources & CAS Key Laboratory of Microbial Physiological and Metabolic Engineering, Institute of Microbiology, Chinese Academy of Sciences, 100101 Beijing, China

<sup>2</sup>College of Life Sciences, University of Chinese Academy of Sciences, 100049 Beijing, China

<sup>3</sup>College of Food Science and Engineering, Inner Mongolia Agricultural University, 010018 Hohhot, Inner Mongolia, China

<sup>4</sup>Key Laboratory of Microbial Diversity Research and Application of Hebei Province, Institute of Life Science and Green Development, College of Life Sciences, Hebei University, 071002 Baoding, Hebei, China

**\* Correspondence:**

Corresponding Author: Zhengyan Guo [guozhengyan@im.ac.cn](mailto:guozhengyan@im.ac.cn)

<sup>†</sup>These authors have contributed equally to this work

## Contents

|                                                                                        |     |
|----------------------------------------------------------------------------------------|-----|
| Supplementary Figure S1. Spectral data of <b>1</b> .                                   | S3  |
| Supplementary Figure S2. Spectral data of <b>2</b> .                                   | S4  |
| Supplementary Figure S3. The MS/MS spectra of AFN B <sub>1</sub> (A) and <b>2</b> (B). | S5  |
| Supplementary Figure S4. Spectral data of <b>3</b> .                                   | S6  |
| Supplementary Figure S5. The MS/MS spectra of <b>3</b> (A) and <b>5</b> (B).           | S7  |
| Supplementary Figure S6. Spectral data of <b>5</b> .                                   | S8  |
| Supplementary Figure S6. Spectral data of <b>5</b> .                                   | S9  |
| Supplementary Figure S6. Spectral data of <b>5</b> .                                   | S10 |
| Supplementary Figure S6. Spectral data of <b>5</b> .                                   | S11 |

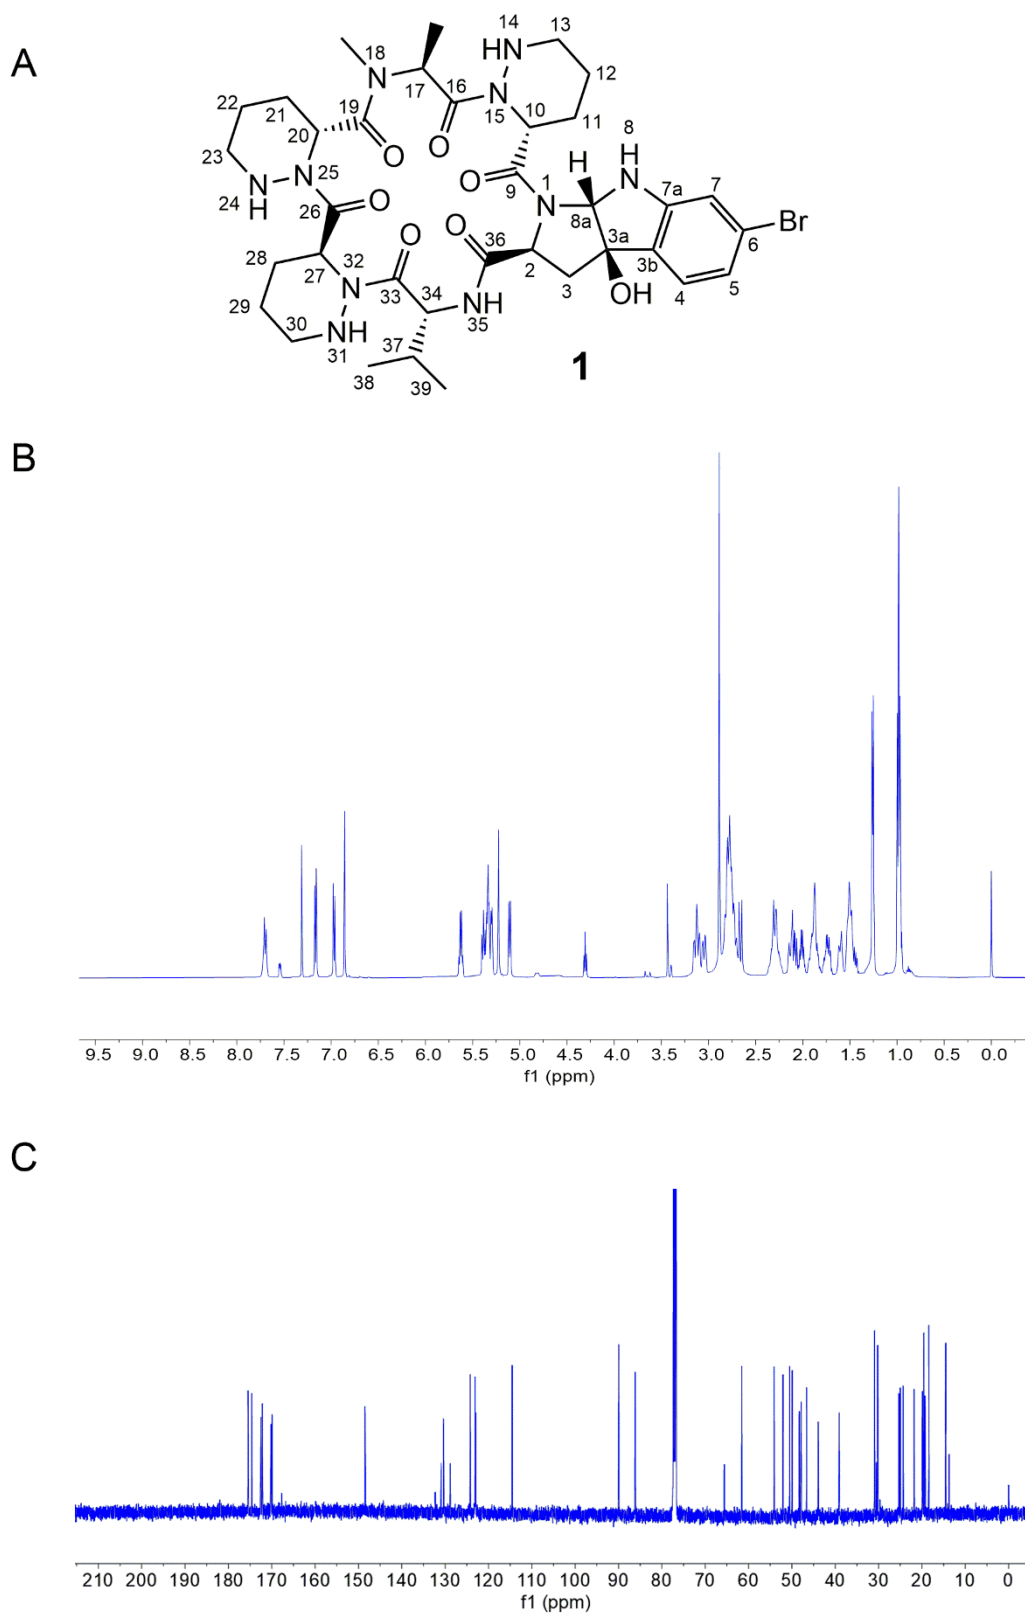

**Supplementary Figure S1.** Spectral data of **1**. (A) Structure of **1**. (B)  $^1\text{H}$  NMR spectrum of **1** in  $\text{CDCl}_3$ . (C)  $^{13}\text{C}$  NMR spectrum of **1** in  $\text{CDCl}_3$ .

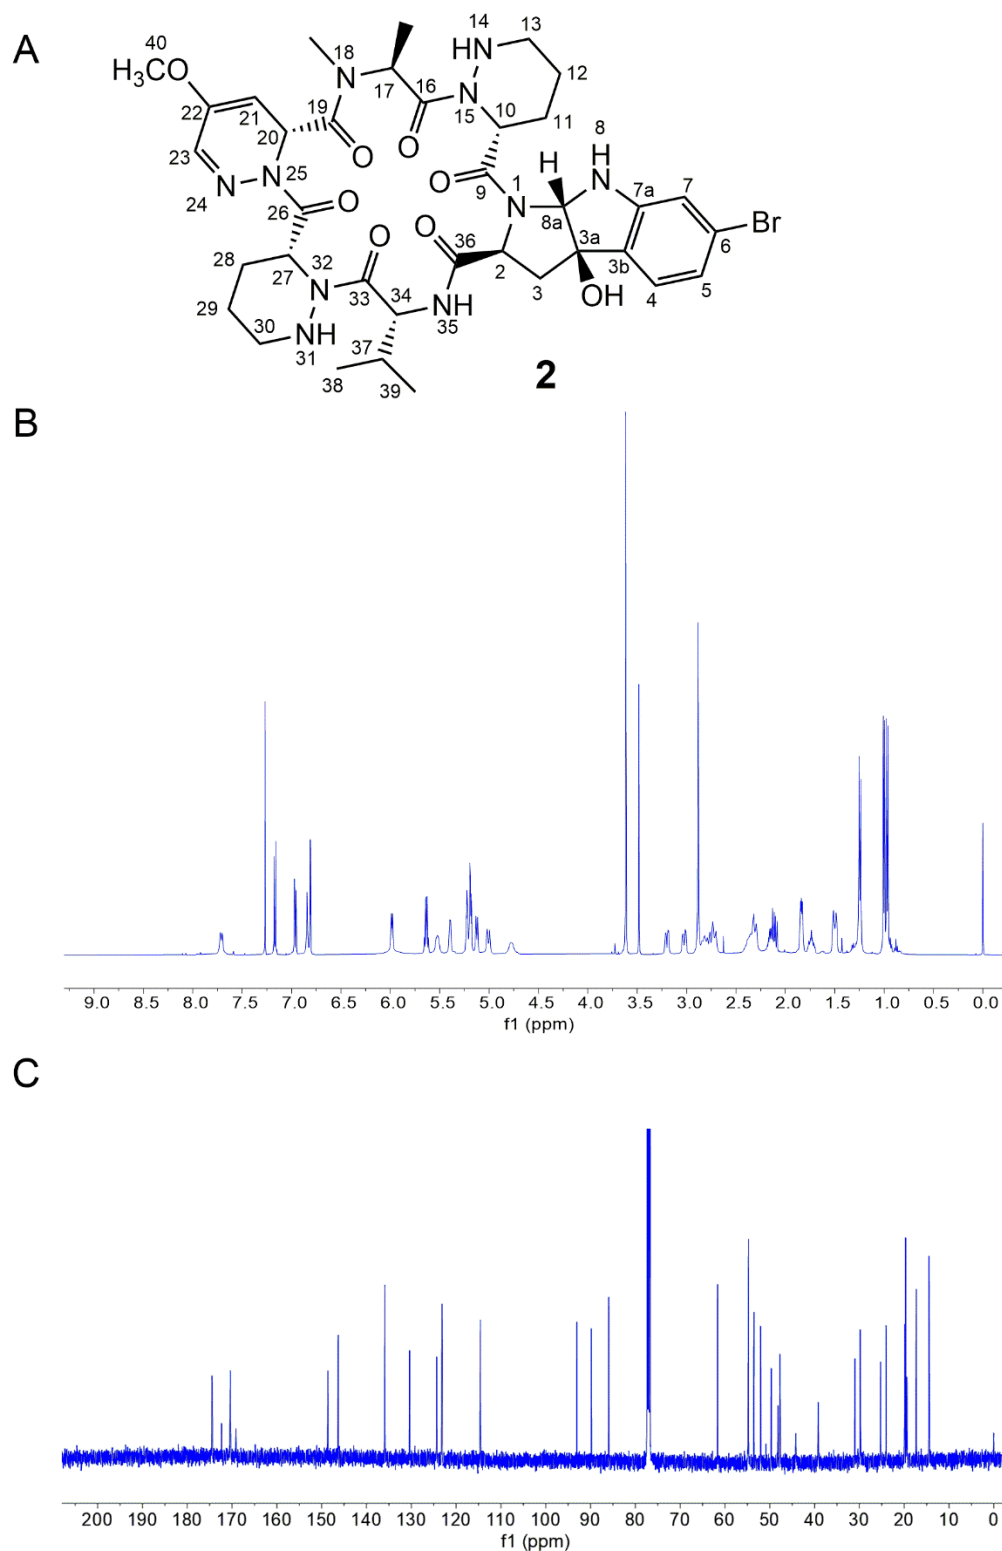

**Supplementary Figure S2.** Spectral data of **2**. (A) Structure of **2**. (B)  $^1\text{H}$  NMR spectrum of **2** in  $\text{CDCl}_3$ . (C)  $^{13}\text{C}$  NMR spectrum of **2** in  $\text{CDCl}_3$ .

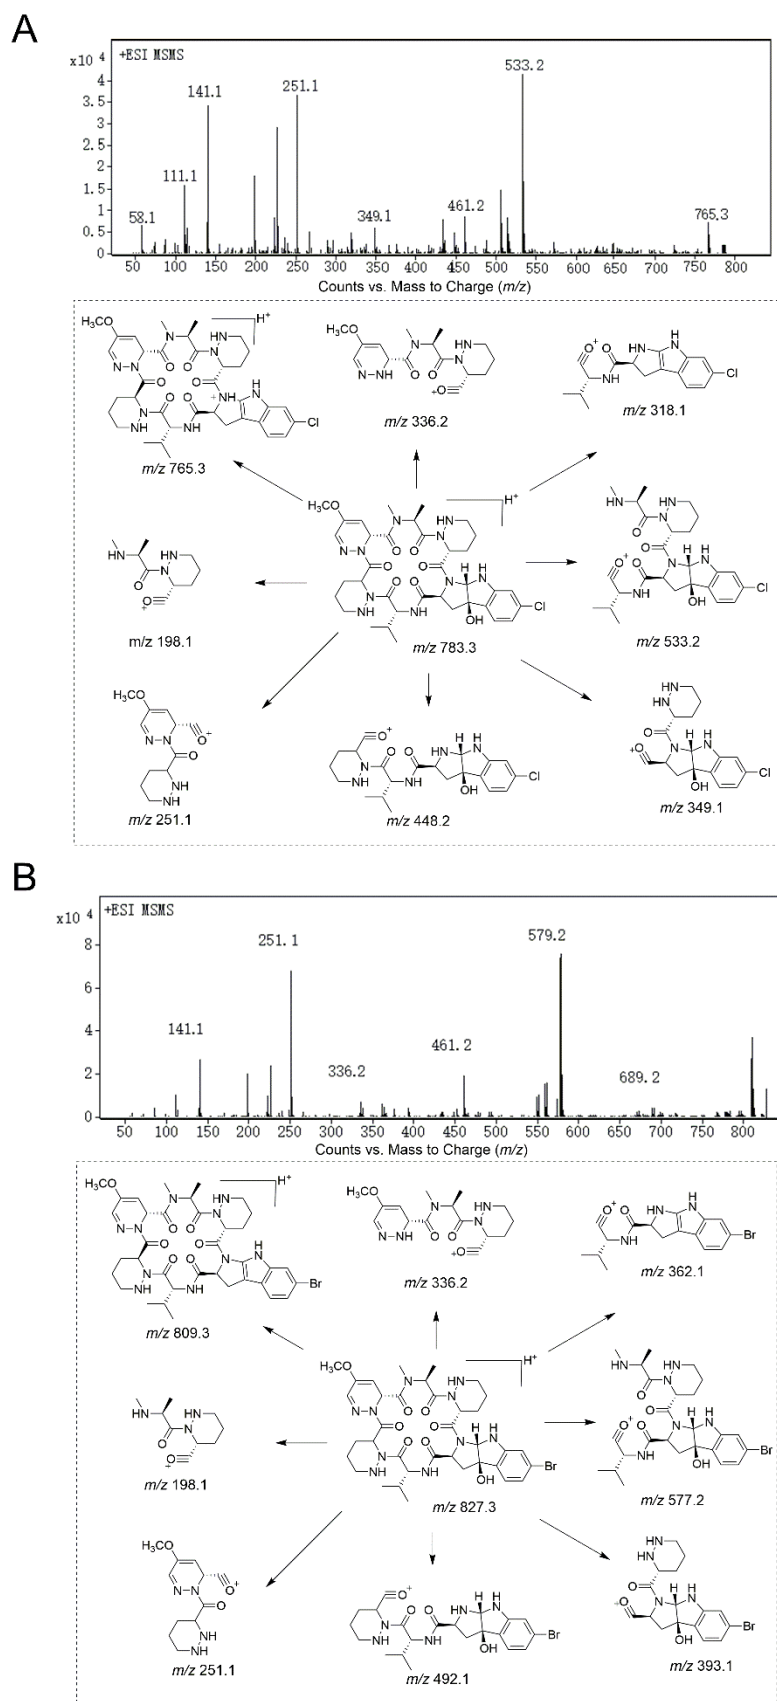

**Supplementary Figure S3.** The MS/MS spectra of AFN B<sub>1</sub> (A) and 2 (B).

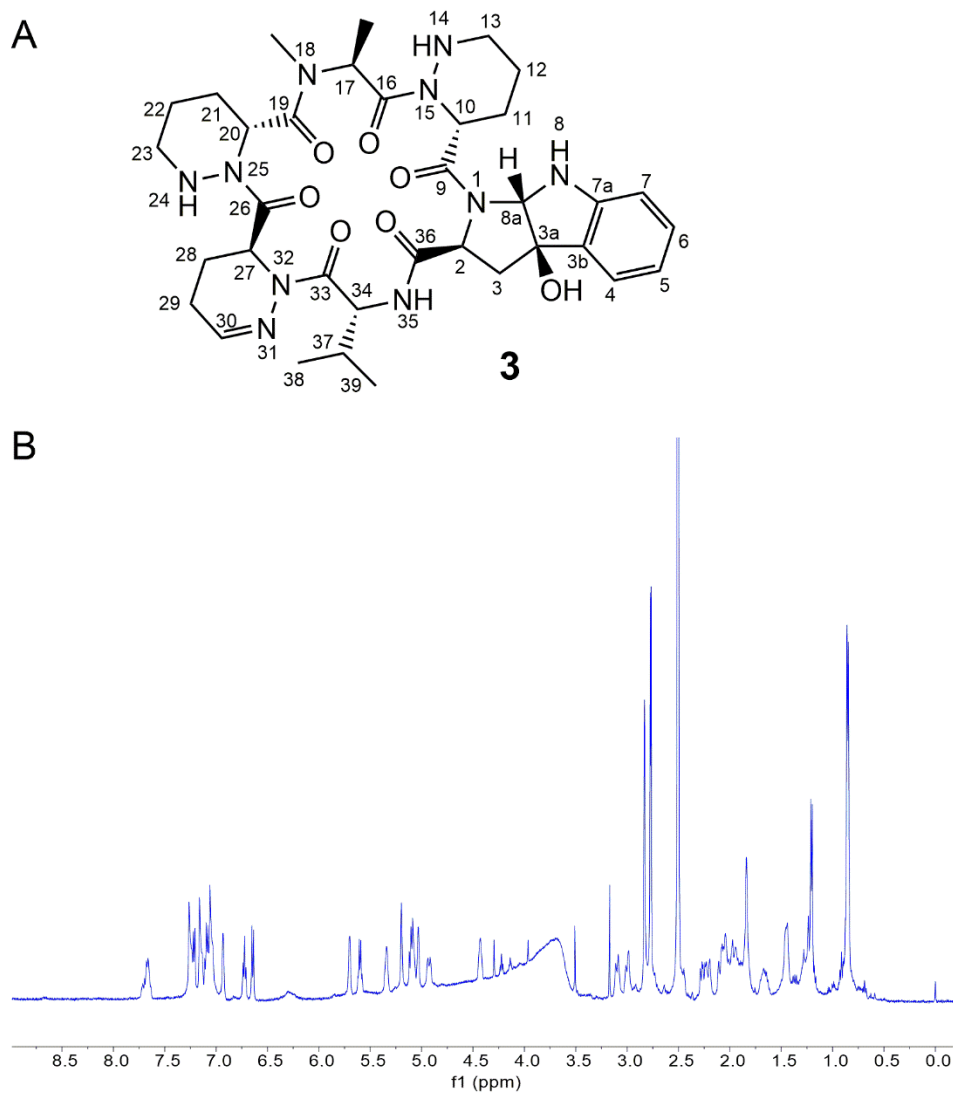

**Supplementary Figure S4.** Spectral data of **3**. (A) Structure of **3**. (B)  $^1\text{H}$  NMR spectrum of **3** in  $\text{DMSO-}d_6$ .

A

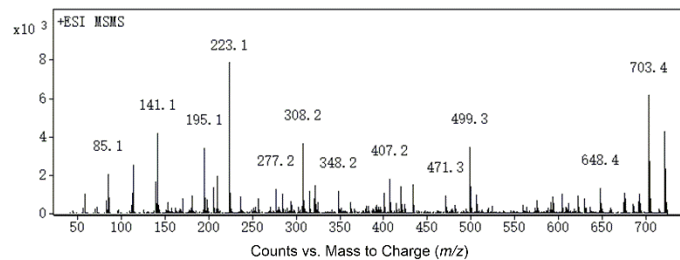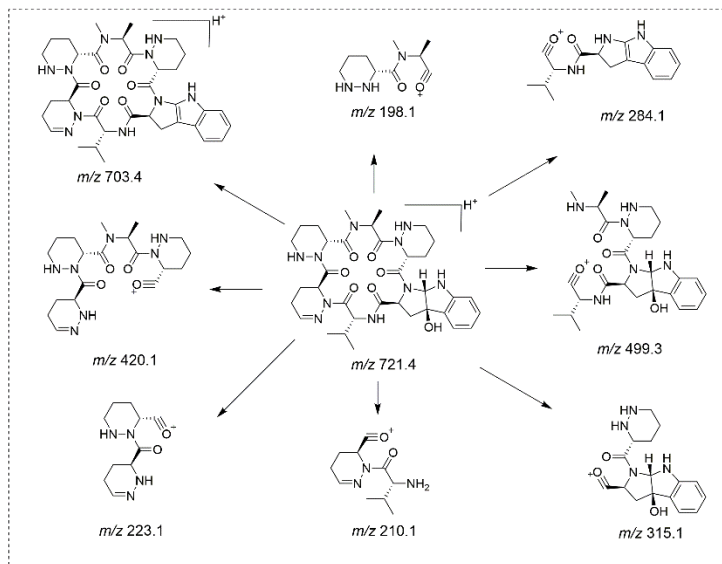

B

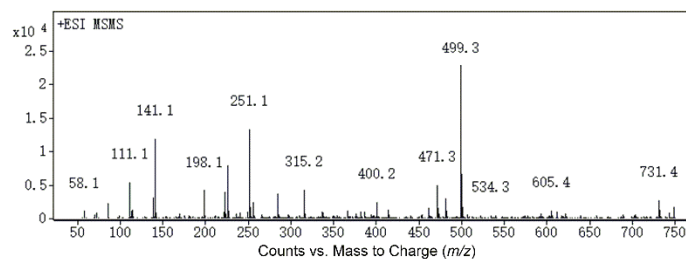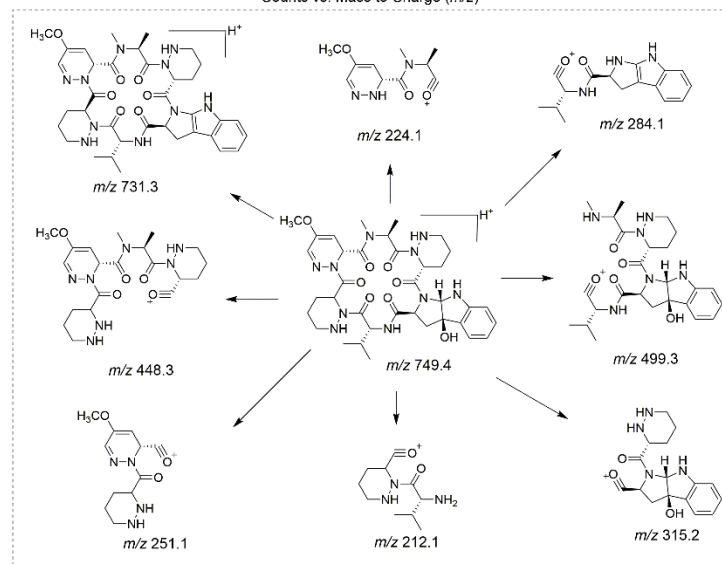

Supplementary Figure S5. The MS/MS spectra of **3** (A) and **5** (B).

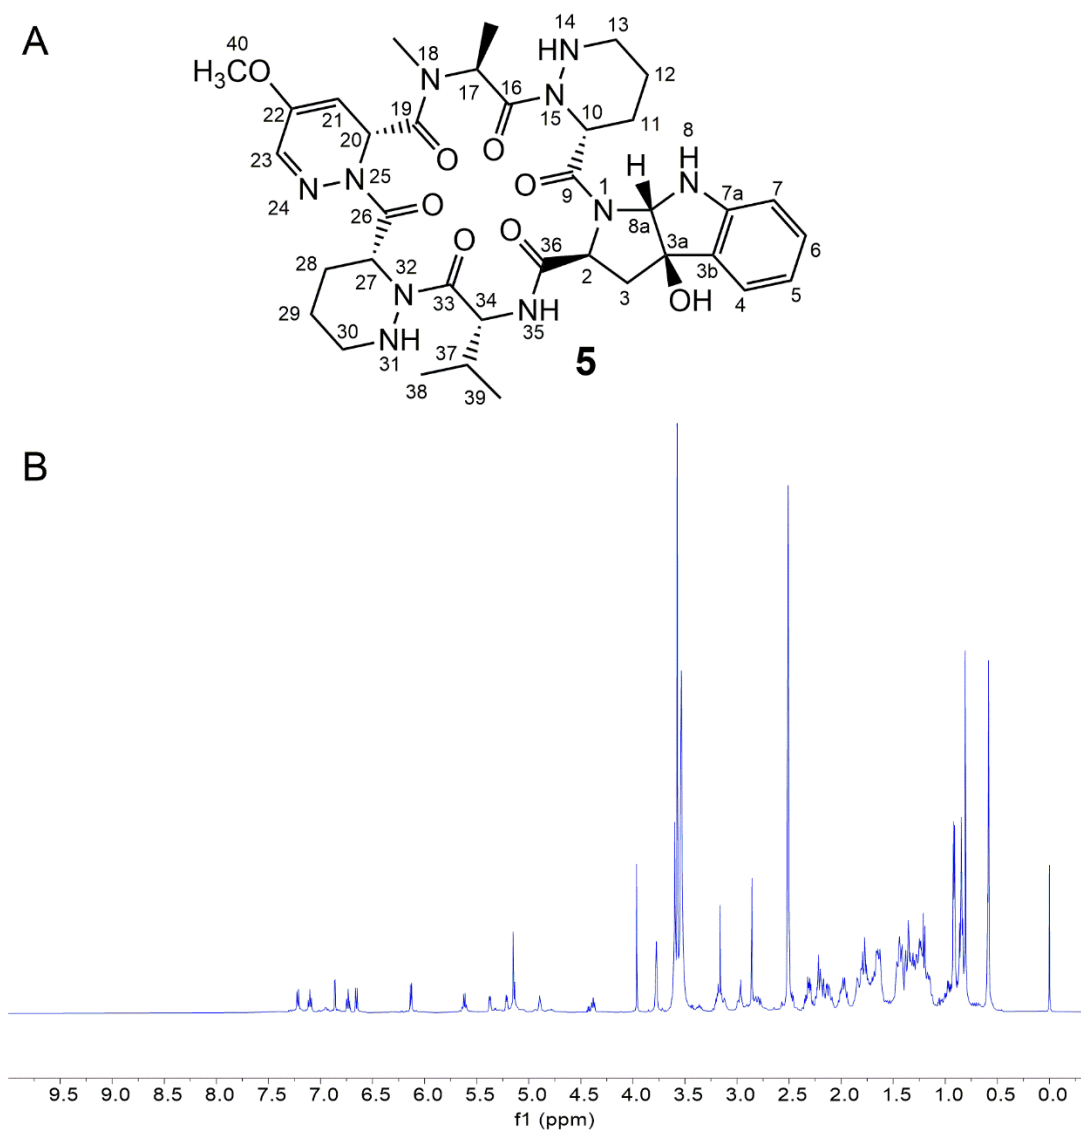

**Supplementary Figure S6.** Spectral data of **5**. (A) Structure of **5**. (B)  $^1\text{H}$  NMR spectrum of **5** in  $\text{DMSO-}d_6$ .



C

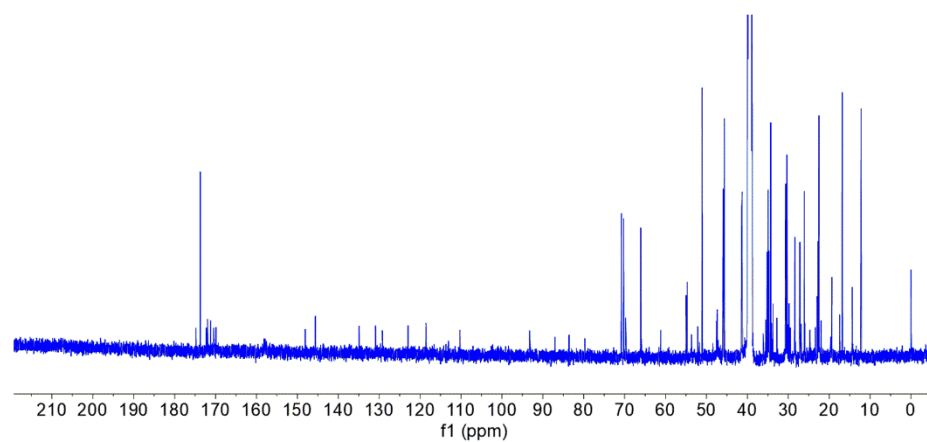

D

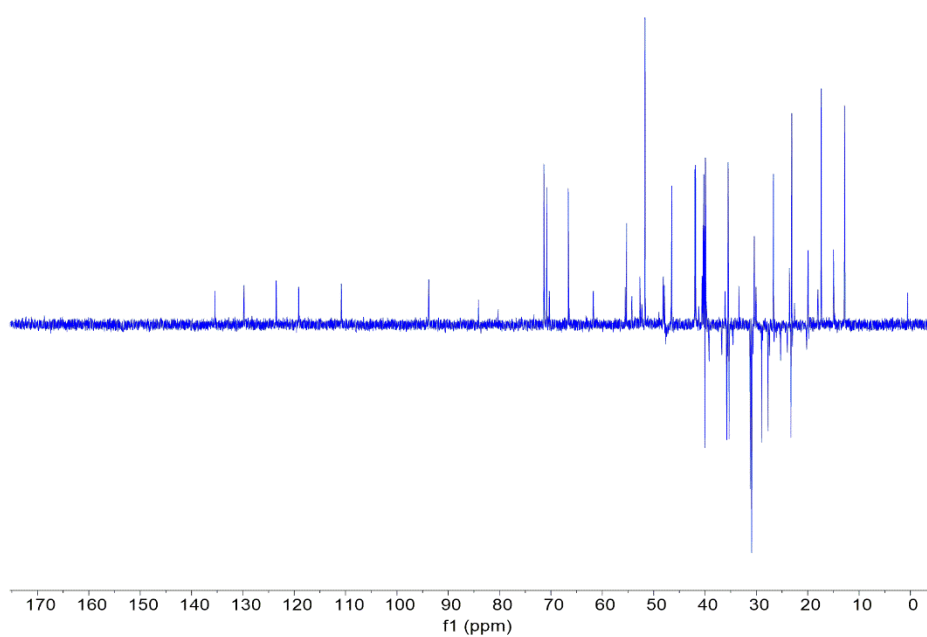

**Supplementary Figure S6.** Spectral data of **5**. (C)  $^{13}\text{C}$  NMR spectrum of **5** in  $\text{DMSO-}d_6$ . (D) DEPT- $^{135}$  spectrum of **5** in  $\text{DMSO-}d_6$ .

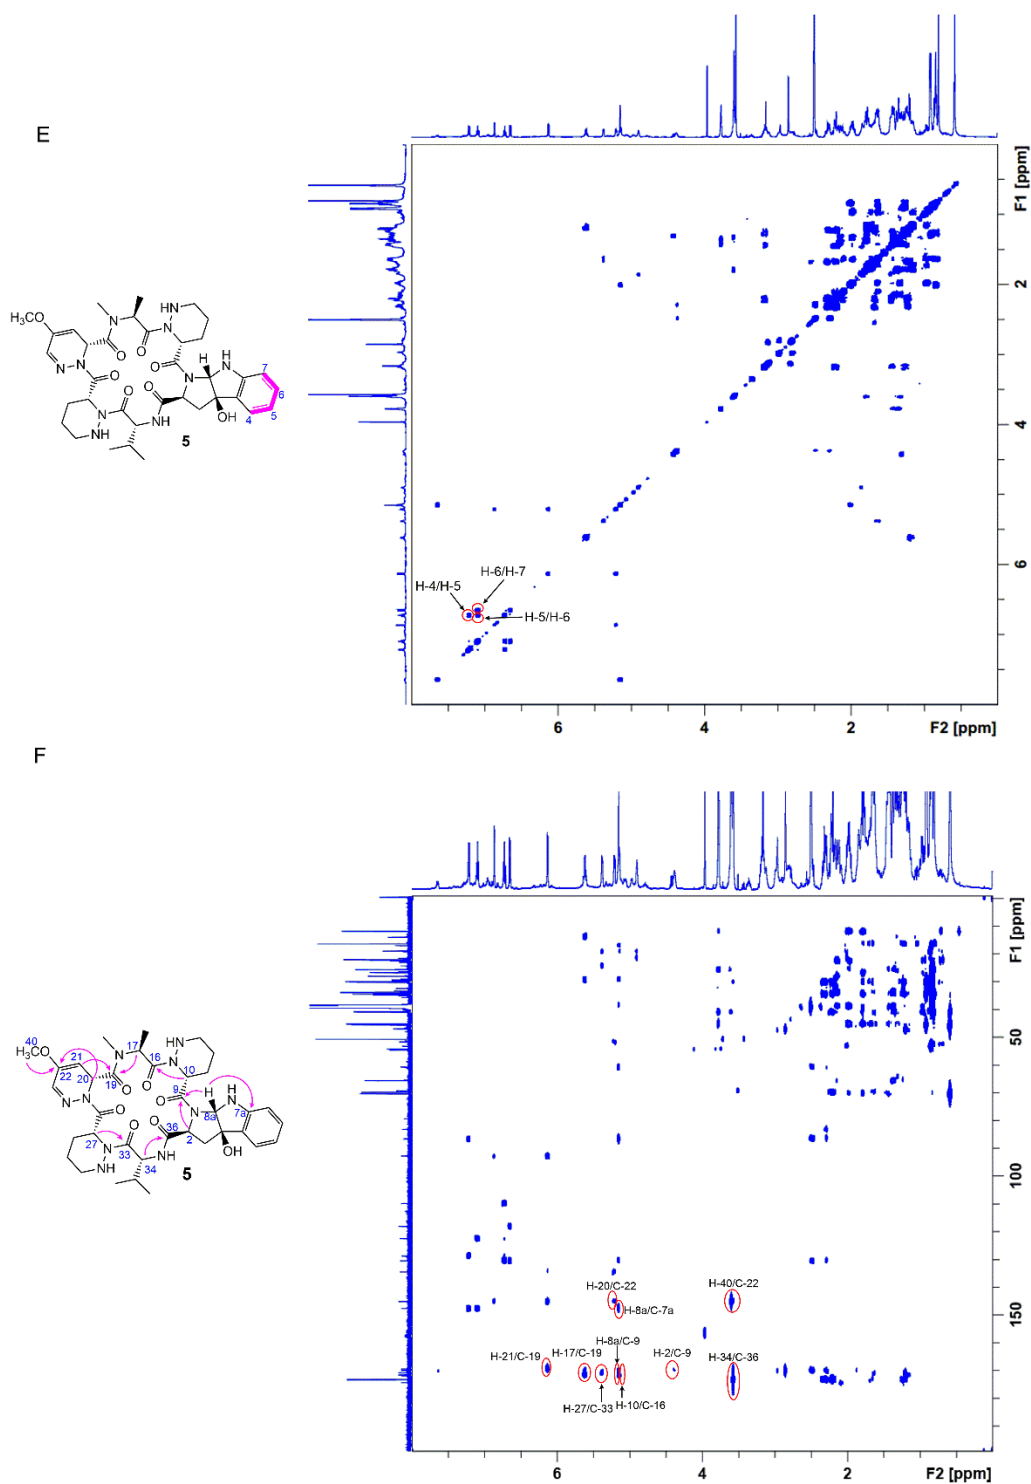

**Supplementary Figure S6.** Spectral data of **5**. (E)  $^1\text{H}$ - $^1\text{H}$  COSY spectrum of **5** in  $\text{DMSO-}d_6$ . The key  $^1\text{H}$ - $^1\text{H}$  COSY correlation are marked on the structure of **5** with pink bold bonds and at the spectrum with red circles. (F) HMBC spectrum of **5** in  $\text{DMSO-}d_6$ . The key HMBC correlations are marked on the structure of **5** with pink arrows and at the spectrum with red circles.

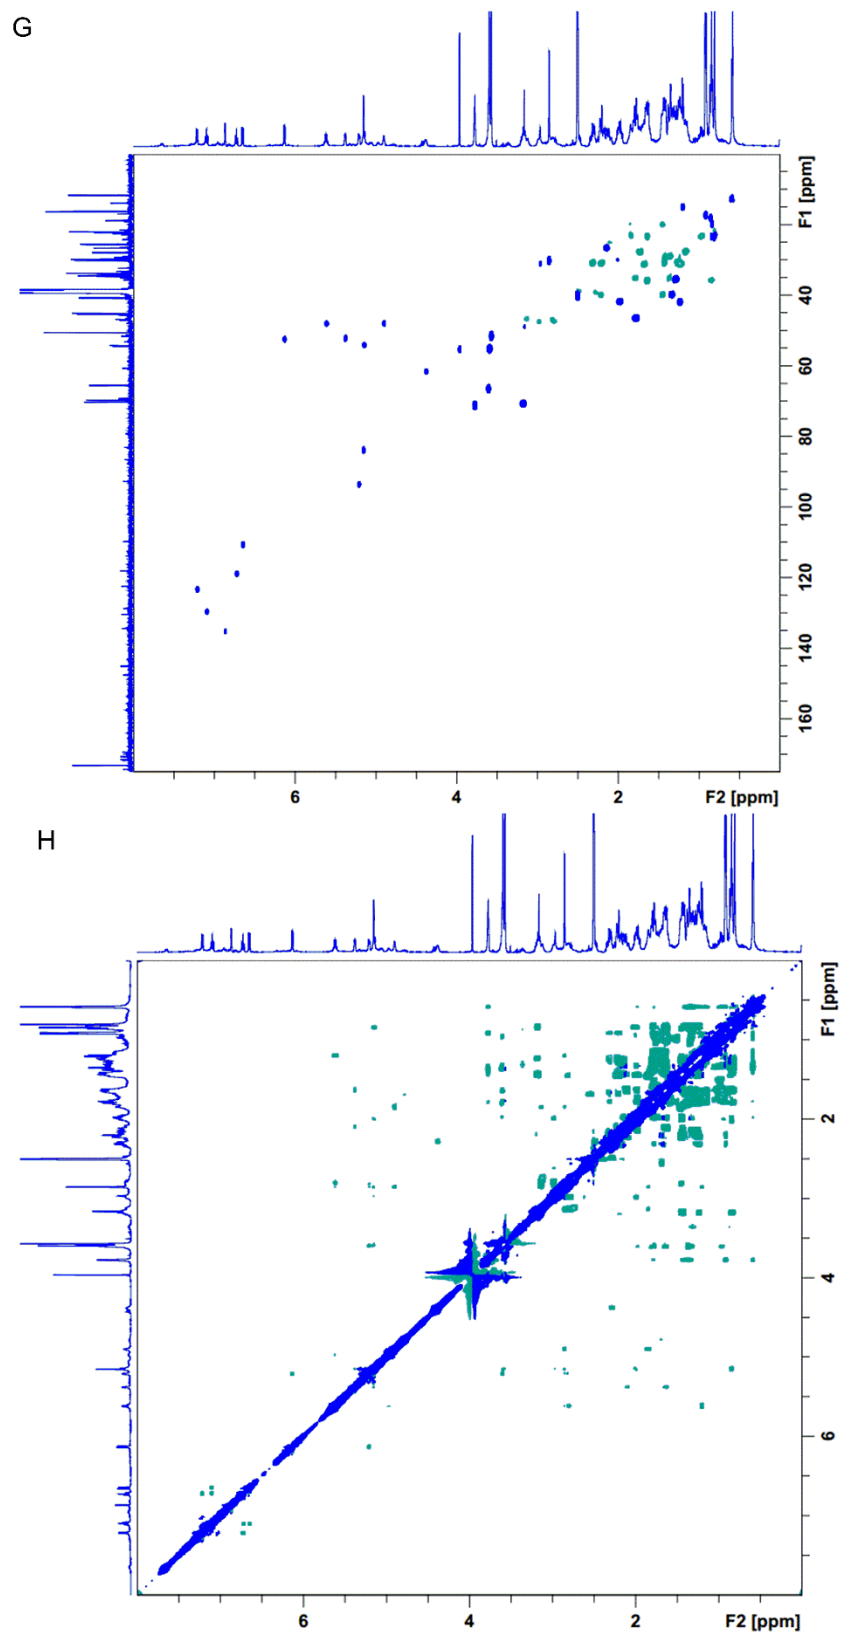

**Supplementary Figure S6.** Spectral data of **5**. (G) HSQC spectrum of **5** in DMSO- $d_6$ . (H) ROESY spectrum of **5** in DMSO- $d_6$ .
